# Supplementary material
Source: Springer Nature journal article supplement (https://www.springermedizin.de/resource/supplementary/12990_2008_202_MOESM2_ESM.pdf/9612776)

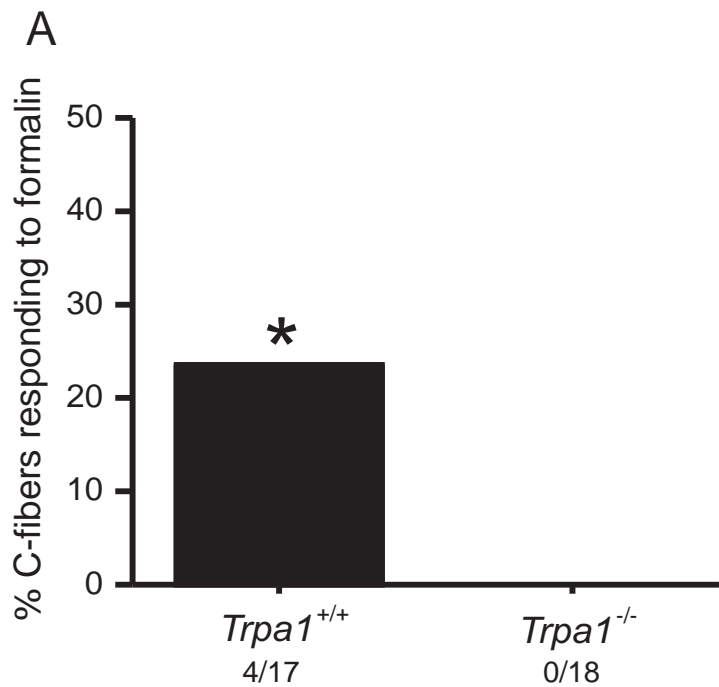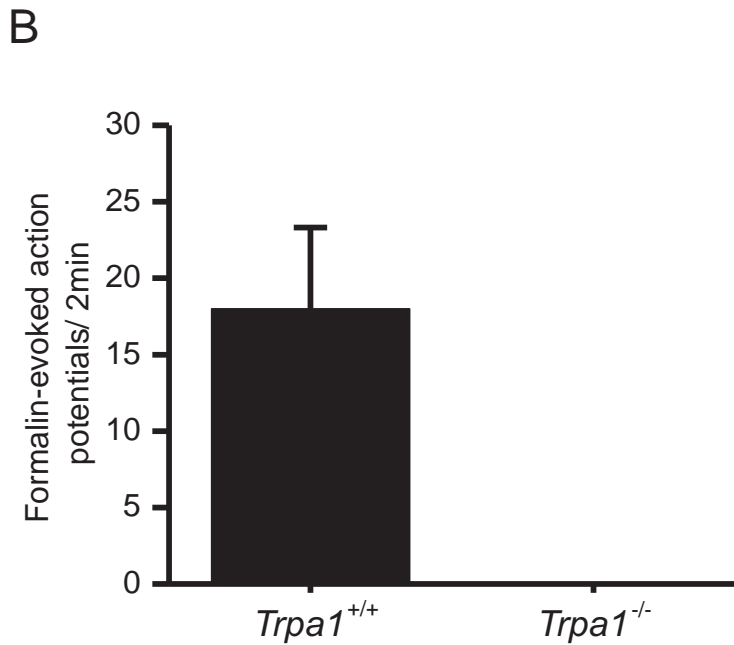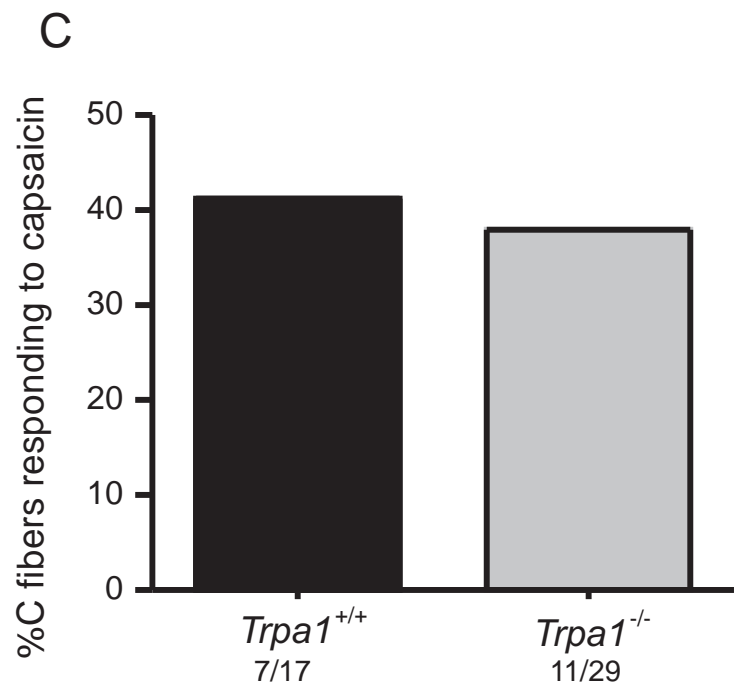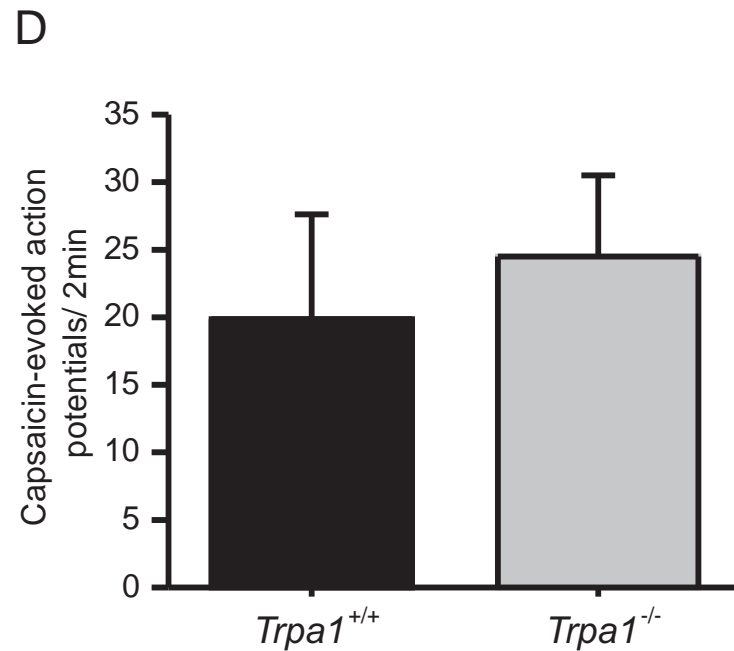

Supplement: MOESM2 [file 9612776]
